# Supplementary material
Source: MDPI journal article supplement (https://www.mdpi.com/1424-2818/11/10/183)
Supplement: s1 [file s1]

## Supplemental Figures Summary

These are maps of throw trap site locations in southern WCA3A. Each panel represents each of the eight different years we sampled for *Pomacea* snails using throw traps from 2006–2015 (we did not sample in 2008–2009). We sampled forty-two different sites in which we found snails, with some sites (1, 2, 33) sampled multiple years, for a total of 50 snail density estimates. The 50 density estimates are provided in Figure 3 of the manuscript. In these supplemental maps provided below, we also show the location of the only three sites in which no snails were found in throw traps over the 8 different years of sampling (Sites 1x, 2x in 2012; Site 3x in 2015) in southern WCA3A. We did not expect many sites yielding zero snails from throw traps, because site selection in southern WCA3A was based on scouting for evidence of snail presence (e.g., seeing egg clusters, or snail kites catching snails) related to different objectives for different studies being conducted over the eight-year period (see methods in the manuscript). All the sites shown in these maps had ground elevations of approximately 190 cm or less (indicated by a horizontal line labeled as ground level in all the maps below). Scaling issues with GIS software resulted in different maps having different overall dimensions and sizes of symbols, but location information is accurate to scale for each map.

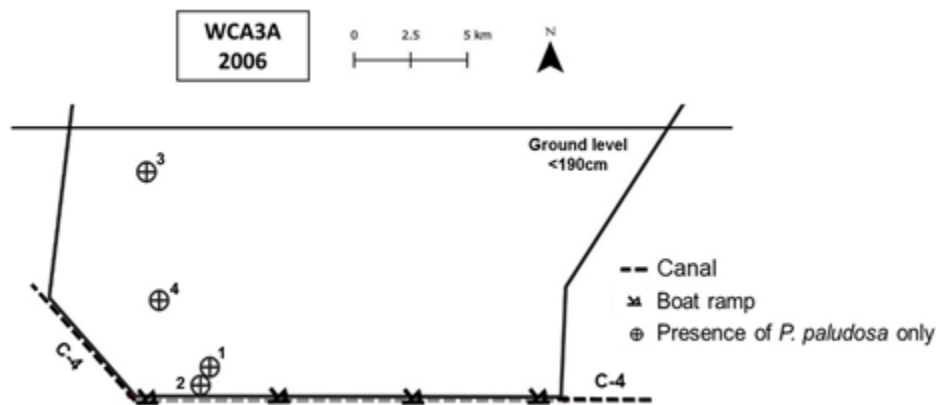

Figure S1. Throw trap site locations in southern WCA3A in 2006.

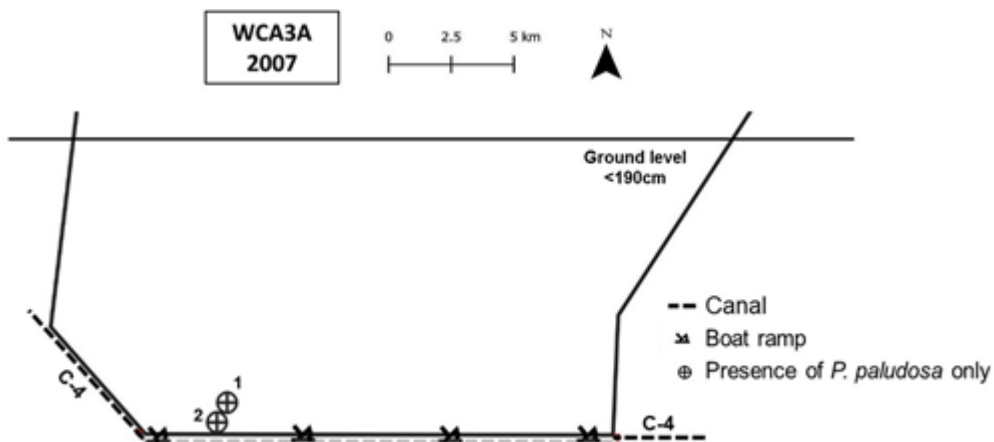

Figure S2. Throw trap site locations in southern WCA3A in 2007.

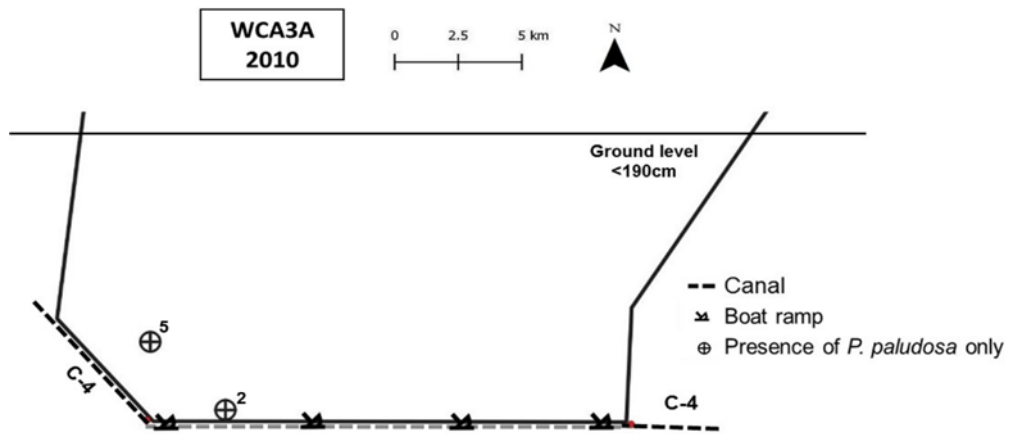

Figure S3. Throw trap site locations in southern WCA3A in 2010.

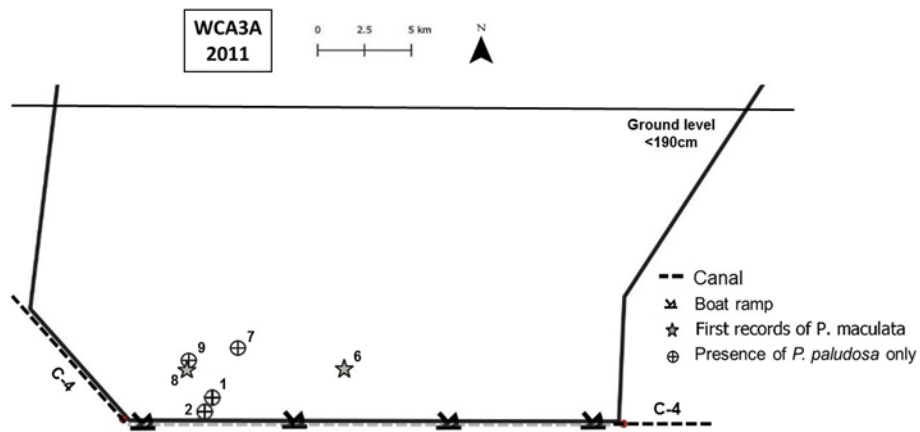

Figure S4. Throw trap site locations in southern WCA3A in 2011.

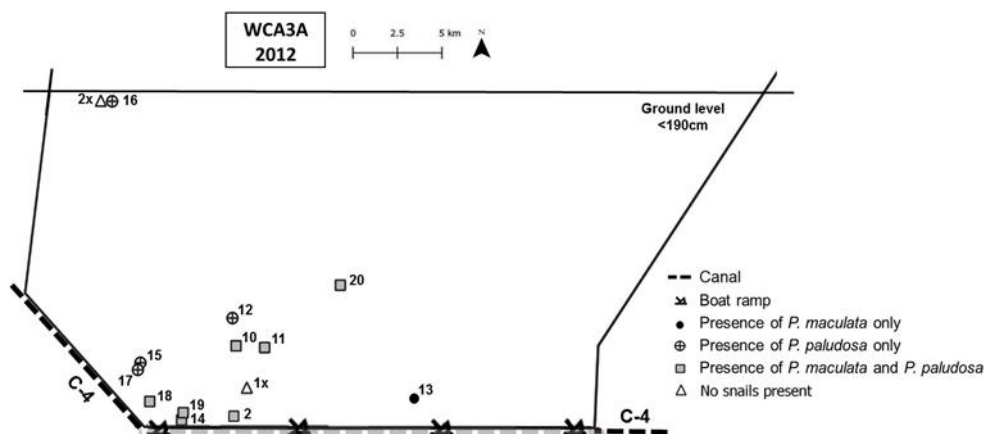

Figure S5. Throw trap site locations in southern WCA3A in 2012.

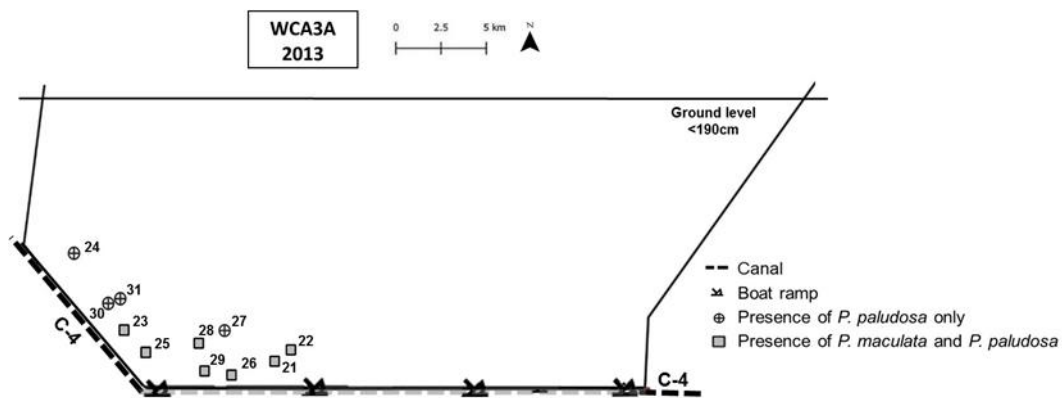

Figure S6. Throw trap site locations in southern WCA3A in 2013.

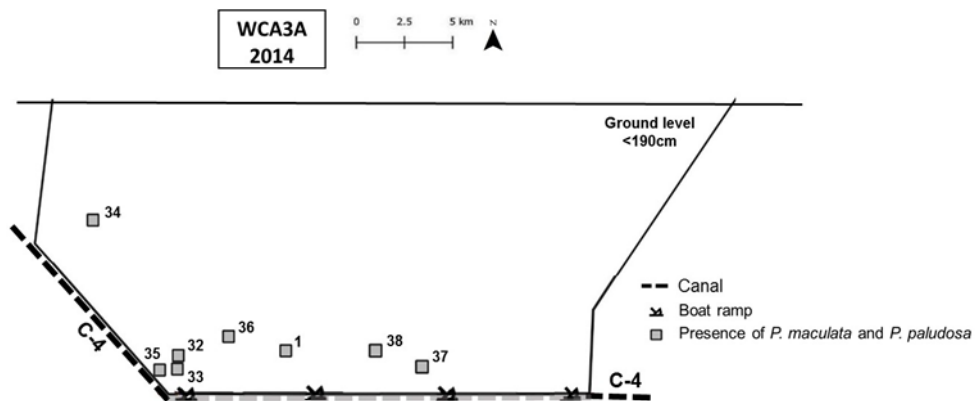

Figure S7. Throw trap site locations in southern WCA3A in 2014.

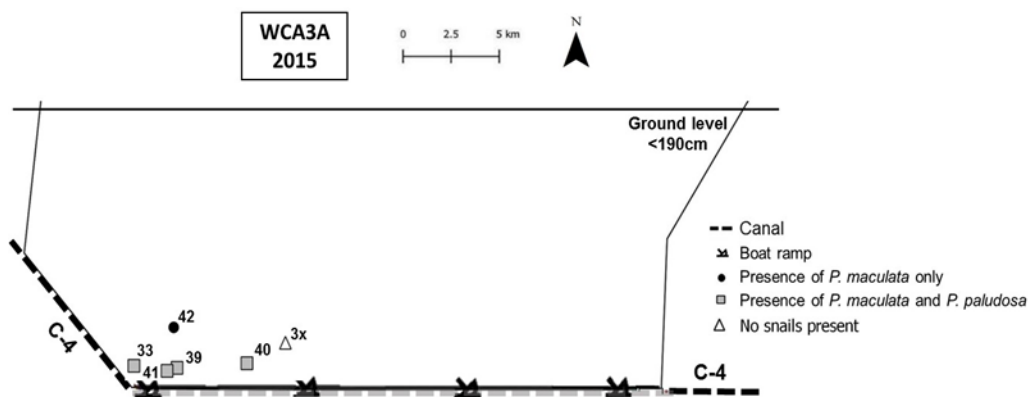

Figure S8. Throw trap site locations in southern WCA3A in 2015.
